# Supplementary material for: miRNA profiling of circulating EpCAM+ extracellular vesicles: promising biomarkers of colorectal cancer
Source: PubMed Central journal article supplement — J Extracell Vesicles. 2016 Aug 29;5:10.3402/jev.v5.31488. doi: 10.3402/jev.v5.31488 (PMC5005366; doi:10.3402/jev.v5.31488), 2016-08-29
Supplement: JEV-5-31488-s001.pdf [file JEV-5-31488-s001.pdf]

A

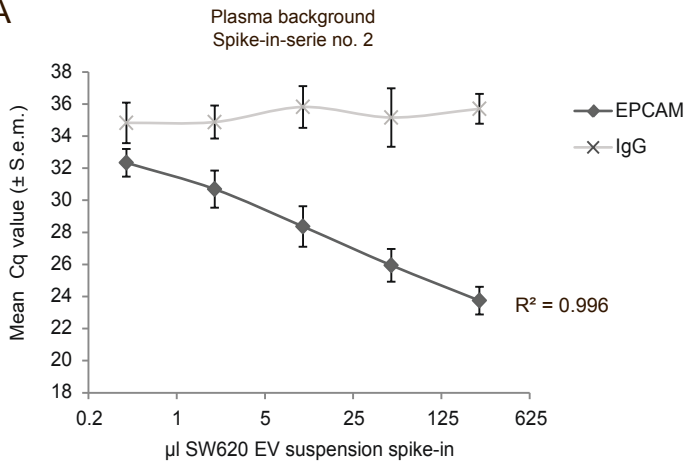

B

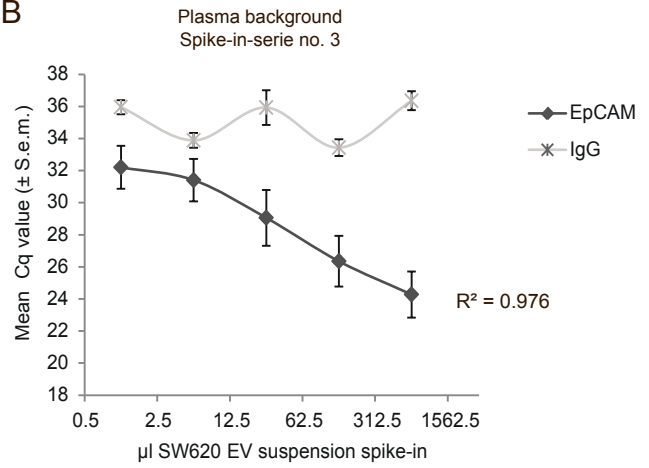

**Supplementary Figure 1. Assessment of linearity and signal-to-noise of the EpCAM-immunoaffinity-capture approach using two independent spike-in series.**

**(A and B)** Two novel plasma spike-in-series (five point - five fold dilutions) were made using independent harvests of conditioned media with SW620 EVs. The EV content of each harvested varied, therefore the spiked volumes of EV suspension varies between the different spike-in series. Four miRNAs (miR-92a-3p, miR-27b-3p, miR-106a-5p, and miR20a-5p) were measured in each spike-in-series using individual miRCURY LNA qPCR-assays. Shown are the mean Cq-values  $\pm$  s.e.m. of all four miRNAs measured after EpCAM or IgG immunoaffinity-capture. In both series the EpCAM immunoaffinity-capture was linear and showed a good signal-to-noise ratio (comparison of EpCAM to IgG) over a wide-range of EV spike-in levels.
